# Supplementary material
Source: PubMed Central journal article supplement (PMC7423283)
Supplement: rstb20190544supp1.pdf [file rstb20190544supp1.pdf]

## Online supporting information

### Evolution of strong reproductive isolation in plants: broad-scale patterns and lessons from a perennial model group

HUIYING SHANG<sup>1,2\*</sup>, JAQUELINE HESS<sup>1,3</sup>, MELINDA PICKUP<sup>4</sup>, DAVID L. FIELD<sup>1,5\*</sup>, PÄR K. INGVARSSON<sup>6</sup>, JIANQUAN LIU<sup>7</sup>, CHRISTIAN LEXER<sup>1</sup>

*Original research paper*

*Theme issue on "The evolution of strong reproductive isolation during speciation"*

Author affiliations:

<sup>1</sup>Department of Botany and Biodiversity Research, University of Vienna, Vienna, Austria

<sup>2</sup>Vienna Graduate School of Population Genetics, Vienna, Austria

<sup>3</sup>Helmholtz Centre for Environmental Research, Halle (Saale), Germany

<sup>4</sup>Institute of Science and Technology (IST), Klosterneuburg, Austria

<sup>5</sup>Edith Cowan University, Perth, Australia

<sup>6</sup>Swedish University of Agricultural Sciences (SLU), Uppsala, Sweden

<sup>7</sup>Key Laboratory for Bio-resources and Eco-environment, College of Life Science, Sichuan University, Chengdu, China

\*Corresponding author: Huiying Shang, Department of Botany and Biodiversity Research, Faculty of Life Sciences, University of Vienna, Rennweg 14, A-1030 Vienna, Austria; Email: [huiying.shang@univie.ac.at](mailto:huiying.shang@univie.ac.at)

David L. Field, Edith Cowan University, Perth, Australia; Email: [d.field@ecu.edu.au](mailto:d.field@ecu.edu.au)

## Online supporting methods

**Plant literature survey: categorisation of gene flow.** The type of genetic marker used (Allozymes, RFLPs, AFLPs, SSRs, SNPs) and number of loci involved (4-1000's) varied markedly between the 127 studies for which we were able to assign a gene flow category. Following Abbott (2017) [1] we categorized gene flow into four categories: very low, low, high and variable. There are, of course, caveats to any single approach/measure for classifying gene flow. Moreover, the diversity of marker and analysis types across the different studies precluded the use of a single quantitative number to classify gene flow. To categorize

each species pair, we used information on the frequency of hybrids and backcrosses (numbers of each hybrid class (F1s, F2s and backcrosses to each parental type) based on STRUCTURE, NewHybrids, Hybrid index) and models of gene flow (IM models such as Migrate, IMA2, Lamarc). Where available  $F_{ST}$  (between populations adjacent to the hybrid zone) was also used as an indicator of gene flow between taxa (and  $N_{em} = 1 - F_{ST}/4 * F_{ST}$  [2, 3]), although  $F_{ST}$  was interpreted with caution and does not equal gene flow. Allocation to gene flow categories was first based on hybrid frequency and the presence of backcrosses. Then, interpretations/conclusions of gene flow from individual studies, Abbott (2017) [1] (supporting information Table S7) and  $F_{ST}$  values (where available) were considered in allocating species pairs to one of four categories. If there was insufficient information, a gene flow category was not assigned:

Very low = very few hybrids observed and backcrosses and advanced generation hybrids absent (or very low frequency). Generally high  $F_{ST}$  ( $F_{ST} > 0.3$ )

Low = low frequency of hybrids, backcrosses and advanced generation hybrids. Generally high  $F_{ST}$  ( $F_{ST} > 0.2$ )

High = high frequency of hybrids and the presence of backcrosses and advanced generation hybrids. Generally low  $F_{ST}$  ( $F_{ST} < 0.2$ )

Variable = patterns of gene flow varied among hybrid zones (applicable when multiple hybrid zones were studied, often in relation to ecological gradients).

**Whole genome sequencing and data processing.** Paired-end resequence reads for all individuals were first analysed using FastQC ([http:// www.bioinformatics.babraham.ac.uk/projects/fastqc/](http://www.bioinformatics.babraham.ac.uk/projects/fastqc/)) to detect poor quality data. Then Trimmomatic [4] was used to remove adapters and low-quality reads with the command “TruSeq3-SE.fa:2:30:10 LEADING:20 TRAILING:20 SLIDINGWINDOW:4:15 MINLEN:36”. The reads of each individual were then mapped to the *P. trichocarpa* reference genome [5] using BWA (Version: 0.7.15-r1140) with the end-to-end alignment option [6]. Picard package v2.5 AddOrReplaceReadGroups was used to add group names and MarkDuplicates was used to remove duplicate reads (<http://broadinstitute.github.io/picard/>). Subsequently, reads in insertion/deletion (indel) regions were identified and realigned using the Genome Analysis Toolkit (GATK v3.6) RealignerTargetCreator and IndelRealigner [7]. Single nucleotide polymorphisms (SNPs) and genotypes were called using the GATK Unified Genotyper and base recalibration using BaseRecalibrator [8]. We used the high-quality SNPs with genotype quality above 20 as reference SNPs. All sites were then filtered with Python script available at Github (<https://github.com/Huiying123>). SNPs were discarded with genotype quality lower than 20, depth lower than 5X, depth higher three times the mean depth and sites with missing data above 50%. As a result, 7,026,036 SNPs were retained and used for subsequent analysis.

**Estimation of a species tree and divergence times from whole-genome phylogenomic data.** To establish a phylogenomic framework for this study, we constructed a species tree using MP-EST version 1.5 [9], an approach based on the multi-species coalescent. We first separated the whole genome resequencing data according to the locations of orthologue genes. For each gene, a gene tree was generated in RAxML version 8.0 [10] using the GTRGAMMAI model with 100 bootstrap replicates. The coalescent species tree was then estimated from the 26,041 rooted orthologue gene trees by maximizing a pseudo-likelihood function in MP-EST. Each analysis started with a random number seed and 10 independent tree searches within each run. To evaluate the bootstrap support of the species tree, we extracted half of the gene trees randomly as input trees to generate the species tree and repeated this step 100 times.

Divergence times among *Populus* taxa were estimated using MCMCTree software in the PAML package [11]. The program is based on a Bayesian algorithm for species divergence time estimation using fossil constraints. We based our estimation procedure on four-fold degenerate sites and the species tree generated from MP-EST. A molecular clock was assumed according to divergence time estimates for *P. alba* and *P. tremula* (2.8-3.2Ma) available from a previous study [12]. We used 100 million years per unit time for the analysis and the root age was set to < 0.1. The mutation rate of *Populus* was estimated to be  $2.5 \times 10^{-9}$  per site per year and we assumed a generation time of 15 years [13]. Therefore, we set the  $\text{rgene\_gamma} = (1, 4)$  and the rate drift parameter  $\text{sigma2\_gamma} = (1, 0.4)$  under the GTR model. The analysis was run 200,000 times with a burn-in of 10,000 iterations and a sample frequency of 100. We did this twice to check for convergence using TRACER for the posterior distribution. Effective sample size values exceeded 200 for each run.

### Online supporting figures and tables

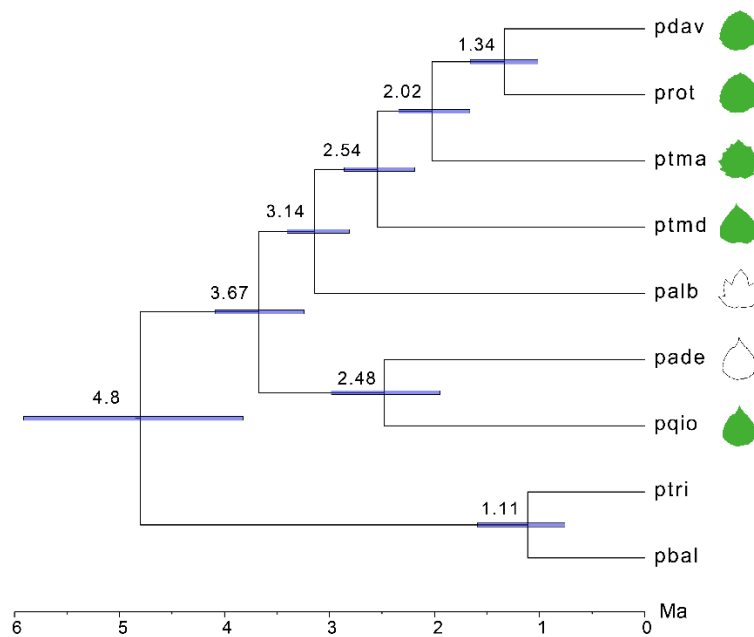

**Supporting Information Fig. S1.** Species tree of all nine *Populus* taxa sampled and sequenced for this study (including outgroups) inferred using the coalescent-based method implemented in MP-EST. Divergence time was estimated with MCMCTree using four-fold degenerate sites. The blue bars along nodes indicate the 95% confidence intervals of divergence time. Species abbreviations follow Fig. 2 of the main paper.

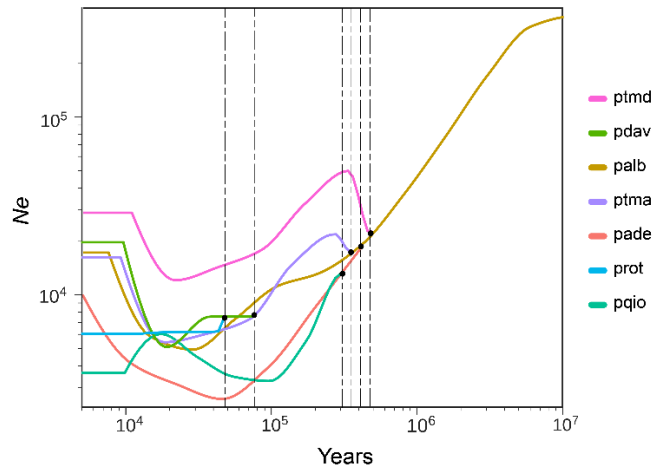

**Supporting Information Fig. S2.** The dynamic effective population size ( $N_e$ ) and divergence times of each species inferred by SMC++.  $N_e$  is shown along the vertical axis, and divergence time in years is shown along the horizontal axis on a log scale. Bifurcation sites indicated by dashed vertical lines (separation points of coloured lines) indicate the divergence times of species pairs.

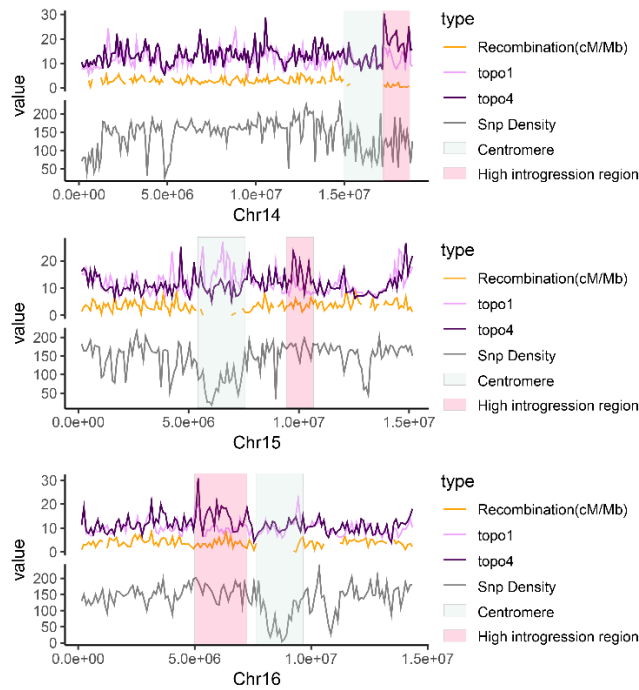

**Supporting Information Fig. S3.** Putatively introgressed regions along chromosomes of early-stage speciation taxa. Weightings for species topology (topo1, pink) and introgression topology (topo4, purple) (**Fig. 4d**) are shown along exemplary chromosomes. The population-scaled recombination rate of *P. tremula* (orange) and SNP density (grey) are shown in 100kb windows. Grey boxes indicate approximate centromeric regions. Pink boxes exemplify regions with consistently increased weightings for the introgression topology (topo4), potentially pointing to locally introgressed chromosome segments.

**Supporting Table S1.** Sampling locations and sample IDs for all sequenced individuals.

| <b>ID</b>           | <b>Species Name</b>                                               | <b>Location (N, E)(Coordinate system:WGS84)</b> |          | <b>Elevation(m)</b> | <b>Number</b> |
|---------------------|-------------------------------------------------------------------|-------------------------------------------------|----------|---------------------|---------------|
| MaoKS-CX-2014-083A  | <i>Populus rotundifolia</i> Griff. var. <i>duclouxiana</i> (Dode) | 29.8194                                         | 102.2435 | 2148.66             | 1             |
| MaoKS-CX-2014-177   | <i>Populus rotundifolia</i> Griff. var. <i>duclouxiana</i> (Dode) | 29.7356                                         | 96.0565  | 3068.15             | 1             |
| MaoKS-CX-2014-261A  | <i>Populus rotundifolia</i> Griff. var. <i>duclouxiana</i> (Dode) | 27.1423                                         | 99.3916  | 2670.89             | 1             |
| LiuJQ-QTP-2013-123  | <i>Populus rotundifolia</i> Griff. var. <i>duclouxiana</i> (Dode) | 29.5170                                         | 94.8716  | 2963.13             | 1             |
| MaoKS-CX-2014-056   | <i>Populus davidiana</i> Dode                                     | 31.5549                                         | 102.4176 | 3362.57             | 1             |
| LiuJQ-MZL-2013-221  | <i>Populus davidiana</i> Dode                                     | 41.0005                                         | 123.1636 | 321.20              | 1             |
| LiuJQ-MZL-2013-302  | <i>Populus davidiana</i> Dode                                     | 45.4693                                         | 130.9263 | 407.00              | 1             |
| LiuJQ-MZL-2013-425  | <i>Populus davidiana</i> Dode                                     | 38.7521                                         | 105.9355 | 1899.92             | 1             |
| LiuJQ-MZL-2013-167  | <i>Populus davidiana</i> Dode                                     | 39.2277                                         | 114.7393 | 1445.70             | 1             |
| MaoKS-CX-2014-311   | <i>Populus adenopoda</i> Maxim.                                   | 25.8204                                         | 107.3589 | 918.42              | 1             |
| MaoKS-CX-2014-320   | <i>Populus adenopoda</i> Maxim.                                   | 27.6683                                         | 107.2082 | 846.08              | 1             |
| LiuJQ-MZL-2013-055  | <i>Populus adenopoda</i> Maxim.                                   | 29.3404                                         | 109.5691 | 830.00              | 1             |
| LiuJQ-MZL-2013-063  | <i>Populus adenopoda</i> Maxim.                                   | 32.3771                                         | 113.3022 | 905.92              | 1             |
| LiuJQ-F-2015-01     | <i>Populus adenopoda</i> Maxim.                                   | 32.7559                                         | 105.2528 | 916.02              | 1             |
| LiuJQ-Tian-2015-001 | <i>Populus qionghaoensis</i> T.Hong et P.Luo                      | 19.1167                                         | 109.0925 | 212.66              | 1             |
| LiuJQ-Tian-2015-002 | <i>Populus qionghaoensis</i> T.Hong et P.Luo                      | 19.1162                                         | 109.0923 | 218.45              | 2             |
| pop2014-3           | <i>Populus alba</i>                                               | 47.4614                                         | 87.8041  | 500.00              | 1             |
| pop2014-5           | <i>Populus alba</i>                                               | 47.3817                                         | 87.8045  | 500.00              | 1             |
| pop2014-15          | <i>Populus alba</i>                                               | 47.3484                                         | 87.8669  | 500.00              | 1             |
| pop2014-24          | <i>Populus alba</i>                                               | 47.7175                                         | 86.8830  | 482.00              | 1             |
| pop2014-26          | <i>Populus alba</i>                                               | 47.0117                                         | 86.2693  | 485.00              | 1             |
| pop2014-45          | <i>Populus tremula</i>                                            | 47.9115                                         | 88.1265  | 993.00              | 1             |
| pop2014-48          | <i>Populus tremula</i>                                            | 47.9623                                         | 88.1792  | 1236.00             | 1             |

|            |                        |         |         |         |   |
|------------|------------------------|---------|---------|---------|---|
| pop2014-50 | <i>Populus tremula</i> | 47.9669 | 88.1836 | 1272.00 | 1 |
| pop2014-52 | <i>Populus tremula</i> | 47.9679 | 88.1852 | 1305.00 | 1 |
| pop2014-53 | <i>Populus tremula</i> | 47.9768 | 88.2001 | 1333.00 | 1 |

**Supporting Table S2.** Sequencing statistics for all sequenced individuals.

| Species name            | ID        | Raw reads | Cleaned reads | Mapping rate | Average depth | SNP     |
|-------------------------|-----------|-----------|---------------|--------------|---------------|---------|
| <i>P. adenopoda</i>     | pade0121  | 51641058  | 47807522      | 92.27%       | 22.18         | 5082714 |
|                         | pade31109 | 69700010  | 64542562      | 91.64%       | 27.11         | 5873211 |
|                         | pade32018 | 76076568  | 70859083      | 87.30%       | 34.34         | 5984982 |
|                         | pade5508  | 62788985  | 58356536      | 91.70%       | 29.76         | 5538752 |
|                         | pade6307  | 85708024  | 79607881      | 92.35%       | 32.61         | 6310055 |
| <i>P. alba</i>          | palb01    | 43330912  | 38009829      | 92.35%       | 15.55         | 7298529 |
|                         | palb02    | 56211103  | 48897168      | 91.03%       | 19.64         | 7497659 |
|                         | palb03    | 41657930  | 35537631      | 90.63%       | 14.67         | 6921131 |
|                         | palb04    | 49828854  | 43107169      | 91.09%       | 17.69         | 8094748 |
|                         | palb05    | 40179026  | 32073180      | 89.82%       | 12.63         | 6885215 |
| <i>P. balsamifera</i>   | pbal01    | 61933611  | 47410704      | 95.58%       | 20.39         | 3316707 |
|                         | pbal02    | 66532895  | 62076405      | 96.92%       | 26.54         | 3402179 |
| <i>P. davidiana</i>     | pdav16709 | 38789412  | 33915862      | 92.29%       | 32.90         | 7545093 |
|                         | pdav22110 | 79929667  | 74313895      | 92.71%       | 38.46         | 7898376 |
|                         | pdav30211 | 92659451  | 86296246      | 92.88%       | 42.87         | 7734377 |
|                         | pdav42521 | 102786028 | 95584067      | 92.12%       | 27.81         | 8202549 |
|                         | pdav5607  | 67161988  | 62385748      | 91.11%       | 15.43         | 7341735 |
| <i>P. qionghaoensis</i> | pqioT0103 | 100321484 | 92067364      | 91.47%       | 42.60         | 7324558 |
|                         | pqioT0202 | 76744734  | 70556396      | 91.24%       | 32.44         | 6612612 |
|                         | pqioT0205 | 82550486  | 76492429      | 91.48%       | 35.56         | 6704599 |

|                        |            |           |           |        |       |          |
|------------------------|------------|-----------|-----------|--------|-------|----------|
| <i>P. rotundifolia</i> | prot083A04 | 47365375  | 40546868  | 91.81% | 18.44 | 7046880  |
|                        | prot12319  | 78975717  | 73288740  | 92.22% | 33.01 | 6973289  |
|                        | prot17718  | 60670864  | 56256163  | 91.48% | 25.19 | 6891117  |
|                        | prot261A13 | 53047205  | 46089672  | 86.66% | 19.34 | 5908876  |
| <i>P. tremula</i>      | ptma01     | 37910238  | 33716847  | 91.15% | 14.29 | 7627370  |
|                        | ptma02     | 63839360  | 56861868  | 90.79% | 23.24 | 8815487  |
|                        | ptma03     | 25993725  | 23350515  | 92.26% | 10.43 | 6980171  |
|                        | ptma04     | 49584091  | 42905174  | 90.28% | 17.68 | 8327853  |
|                        | ptma05     | 57261669  | 51099511  | 91.97% | 21.92 | 8863568  |
| <i>P. tremuloides</i>  | ptmd01     | 99361734  | 92255121  | 91.70% | 28.51 | 9785394  |
|                        | ptmd02     | 96230649  | 88156718  | 91.09% | 28.35 | 9890484  |
|                        | ptmd03     | 96387182  | 88430839  | 91.98% | 29.22 | 9944656  |
|                        | ptmd04     | 108934535 | 100107534 | 91.23% | 31.81 | 9951773  |
|                        | ptmd05     | 130684419 | 118019244 | 91.26% | 37.69 | 10145944 |
| <i>P. trichocarpa</i>  | ptri01     | 99715650  | 95227609  | 94.03% | 38.16 | 2088232  |
|                        | ptri02     | 98048861  | 91057729  | 94.72% | 34.96 | 2126432  |

**Supporting Table S3.** Divergence time estimates in millions of years (Mya) obtained with MCMC tree within the PAML software package.

| Splits                                                          | Posterior mean(MyA) | 95% HPD CI(MyA) | HPD-CI-width(MyA) |
|-----------------------------------------------------------------|---------------------|-----------------|-------------------|
| (ptri,pbal)-((pade,pqio),(palb, (ptmd, (ptma, (pdav, prot)))))) | 4.8                 | (3.62, 6.06)    | 2.44              |
| (pade,pqio)-(palb, (ptmd, (ptma, (pdav, prot))))                | 3.67                | (3.17, 4.15)    | 0.98              |
| palb- (ptmd, (ptma, (pdav, prot)))                              | 3.14                | (2.81, 3.41)    | 0.6               |
| ptmd- (ptma, (pdav, prot))                                      | 2.54                | (2.16, 2.88)    | 0.71              |
| ptma-(pdav, prot)                                               | 2.02                | (1.66, 2.36)    | 0.7               |
| pdav-prot                                                       | 1.34                | (0.98, 1.66)    | 0.68              |
| pade-pqio                                                       | 2.48                | (1.85, 3.09)    | 1.24              |
| ptri-pbal                                                       | 1.11                | (0.70, 1.62)    | 0.93              |

**Supporting Table S4.** Spearman rank correlation and linear regression statistics for relationships between average TWISST tree topology weightings for each chromosome and average recombination rate or gene density in windows of 100kb along each chromosome. Results for the topologies discussed in the main text are indicated by bold red type. For footnote see overleaf.

Spearman's correlation analysis between average weighting of each topology and recombination or gene density

| Topology     | Ancient introgression               |                                    | Recent introgression                |                                    |
|--------------|-------------------------------------|------------------------------------|-------------------------------------|------------------------------------|
|              | Average Weighting and recombination | Average Weighting and gene density | Average Weighting and recombination | Average Weighting and gene density |
| <b>topo1</b> | r=0.5; p=0.0310                     | r=-0.297; p=0.217                  | <b>r=-0.688; p=0.001546</b>         | <b>r=0.735; p=0.0003408</b>        |
| topo2        | r=0.516; p=0.0255                   | r=-0.250; p=0.301                  | r=0; p=1                            | r=-0.22; p=0.3662                  |
| topo3        | r=0.660; p=0.00273                  | r=-0.507; p=0.0267                 | r=0.289; p=0.2286                   | r=-0.3418; p=0.152                 |
| <b>topo4</b> | <b>r=0.258; p=0.2852</b>            | <b>r=0.225; p=0.3545</b>           | <b>r=-0.854; p=2.2e-16</b>          | <b>r=0.793; p=5.029e-05</b>        |
| <b>topo5</b> | <b>r=0.163; p=0.503</b>             | <b>r=-0.228; p=0.3487</b>          | r=-0.342; p=0.1518                  | r=0.283; p=0.2405                  |
| <b>topo6</b> | <b>r=-0.653; p=0.00312</b>          | <b>r=0.728; p=0.00041</b>          | r=-0.291; p=0.2257                  | r=0.0413; p=0.8667                 |
| topo7        | r=0.711; p=0.000927                 | r=-0.643; p=0.00297                | r=0.812; p=2.485e-05                | r=-0.842; p=6.213e-06              |
| topo8        | r=0.656; p=0.00292                  | r=-0.774; p=0.00010                | r=0.849; p=2.2e-16                  | r=-0.718; p=0.000525               |
| topo9        | r=0.681; p=0.00179                  | r=-0.887; p=4.29e-07               | r=0.884; p=2.2e-16                  | r=-0.731; p=0.000376               |
| topo10       | r=0.311; p=0.1953                   | r=-0.146; p=0.5513                 | r=0.796; p=6.04e-05                 | r=-0.793; p=5.029e-05              |



|        |                      |                      |                     |                      |
|--------|----------------------|----------------------|---------------------|----------------------|
| topo11 | r=-0.844; p=2.2-16   | r=0.605; p=0.00611   | r=0.658; p=0.00282  | r=-0.687; p=0.00115  |
| topo12 | r=0.153; p=0.5313    | r=-0.266; p=0.2705   | r=0.867; p=2.2e-16  | r=-0.698; p=0.000896 |
| topo13 | r=0.598; p=0.00794   | r=-0.682; p=0.0013   | r=-0.705; p=0.00105 | r=0.783; p=7.16e-05  |
| topo14 | r=-0.788; p=9.61e-05 | r=0.695; p=0.00096   | r=0.739; p=0.000455 | r=-0.784; p=7.16e-05 |
| topo15 | r=0.646; p=0.00355   | r=-0.787; p=6.31e-05 | r=0.830; p=3.22e-06 | r=-0.713; p=0.000617 |

Linear regression analysis between average weighting of each topology and recombination or gene density

| Topology | Ancient introgression               |              |              |               |              |                                    |              |              |               |              | Recent introgression                |              |              |              |              |                                    |              |              |              |              |
|----------|-------------------------------------|--------------|--------------|---------------|--------------|------------------------------------|--------------|--------------|---------------|--------------|-------------------------------------|--------------|--------------|--------------|--------------|------------------------------------|--------------|--------------|--------------|--------------|
|          | Average Weighting and recombination |              |              |               |              | Average Weighting and gene density |              |              |               |              | Average Weighting and recombination |              |              |              |              | Average Weighting and gene density |              |              |              |              |
|          | slope                               | intercept    | R2           | R2.Ad         | P            | slope                              | intercept    | R2           | R2.Ad         | P            | slope                               | intercept    | R2           | R2.Ad        | P            | slope                              | intercept    | R2           | R2.Ad        | P            |
| topo1    | 0.004                               | 0.026        | 0.322        | 0.282         | 0.011        | -0.001                             | 0.05         | 0.253        | 0.209         | 0.028        | <b>-0.015</b>                       | <b>0.161</b> | <b>0.517</b> | <b>0.488</b> | <b>0.001</b> | <b>0.005</b>                       | <b>0.056</b> | <b>0.495</b> | <b>0.465</b> | <b>0.001</b> |
| topo2    | 0.002                               | 0.035        | 0.174        | 0.125         | 0.076        | -0.001                             | 0.046        | 0.083        | 0.029         | 0.231        | 0                                   | 0.071        | 0.003        | -0.056       | 0.825        | 0                                  | 0.071        | 0.005        | -0.054       | 0.776        |
| topo3    | 0.004                               | 0.016        | 0.451        | 0.419         | 0.002        | -0.001                             | 0.039        | 0.325        | 0.285         | 0.011        | 0.001                               | 0.063        | 0.039        | -0.017       | 0.417        | 0                                  | 0.071        | 0.042        | -0.015       | 0.401        |
| topo4    | <b>0.001</b>                        | <b>0.129</b> | <b>0.015</b> | <b>-0.043</b> | <b>0.613</b> | <b>0.001</b>                       | <b>0.124</b> | <b>0.072</b> | <b>0.017</b>  | <b>0.267</b> | <b>-0.023</b>                       | <b>0.195</b> | <b>0.761</b> | <b>0.747</b> | <b>0</b>     | <b>0.007</b>                       | <b>0.049</b> | <b>0.56</b>  | <b>0.535</b> | <b>0</b>     |
| topo5    | <b>0.002</b>                        | <b>0.124</b> | <b>0.021</b> | <b>-0.037</b> | <b>0.554</b> | <b>-0.001</b>                      | <b>0.136</b> | <b>0.028</b> | <b>-0.029</b> | <b>0.491</b> | -0.002                              | 0.071        | 0.132        | 0.081        | 0.126        | 0                                  | 0.064        | 0.008        | -0.051       | 0.722        |
| topo6    | <b>-0.02</b>                        | <b>0.278</b> | <b>0.53</b>  | <b>0.502</b>  | <b>0</b>     | <b>0.007</b>                       | <b>0.144</b> | <b>0.502</b> | <b>0.472</b>  | <b>0.001</b> | -0.003                              | 0.093        | 0.072        | 0.017        | 0.268        | 0                                  | 0.082        | 0.001        | -0.057       | 0.878        |
| topo7    | 0.004                               | 0.029        | 0.498        | 0.469         | 0.001        | -0.001                             | 0.054        | 0.388        | 0.352         | 0.004        | 0.007                               | 0.024        | 0.711        | 0.694        | 0            | -0.002                             | 0.073        | 0.628        | 0.607        | 0            |
| topo8    | 0.006                               | 0.018        | 0.501        | 0.472         | 0.001        | -0.002                             | 0.057        | 0.517        | 0.489         | 0.001        | 0.007                               | 0.02         | 0.724        | 0.708        | 0            | -0.002                             | 0.061        | 0.407        | 0.372        | 0.003        |
| topo9    | 0.006                               | 0.011        | 0.548        | 0.522         | 0            | -0.002                             | 0.051        | 0.563        | 0.538         | 0            | 0.008                               | 0.032        | 0.831        | 0.821        | 0            | -0.002                             | 0.077        | 0.453        | 0.421        | 0.002        |
| topo10   | 0.001                               | 0.032        | 0.216        | 0.169         | 0.045        | 0                                  | 0.039        | 0.053        | -0.002        | 0.342        | 0.007                               | 0.019        | 0.695        | 0.677        | 0            | -0.002                             | 0.064        | 0.533        | 0.505        | 0            |
| topo11   | -0.009                              | 0.105        | 0.697        | 0.679         | 0            | 0.002                              | 0.05         | 0.377        | 0.341         | 0.005        | 0.007                               | 0.024        | 0.574        | 0.549        | 0            | -0.002                             | 0.069        | 0.42         | 0.386        | 0.003        |
| topo12   | 0.001                               | 0.034        | 0.082        | 0.028         | 0.233        | -0.001                             | 0.045        | 0.17         | 0.122         | 0.079        | 0.005                               | 0.035        | 0.758        | 0.744        | 0            | -0.001                             | 0.066        | 0.439        | 0.406        | 0.002        |
| topo13   | 0.005                               | 0.023        | 0.457        | 0.425         | 0.001        | -0.002                             | 0.058        | 0.411        | 0.377         | 0.003        | -0.011                              | 0.132        | 0.525        | 0.497        | 0            | 0.004                              | 0.057        | 0.579        | 0.554        | 0            |
| topo14   | -0.01                               | 0.117        | 0.599        | 0.576         | 0            | 0.003                              | 0.055        | 0.366        | 0.328         | 0.006        | 0.006                               | 0.034        | 0.557        | 0.53         | 0            | -0.002                             | 0.077        | 0.574        | 0.549        | 0            |
| topo15   | 0.004                               | 0.023        | 0.467        | 0.436         | 0.001        | -0.002                             | 0.05         | 0.594        | 0.57          | 0            | 0.006                               | 0.024        | 0.714        | 0.697        | 0            | -0.002                             | 0.063        | 0.522        | 0.494        | 0            |

Footnote to Supporting Table S4

The R-squared (R2) statistic: a measure of how well the model fits the data, expressed as percentage of the response variable variation explained by a linear model. The value is a biased estimate based on the sample size. R2.Ad: unbiased R2. P-value: the ability to reject the null hypothesis. If the p-value is less than 0.05 or 0.01, corresponding respectively to a 5% or 1% chance of rejecting the null hypothesis when it is true. Calculated by F-statistics.

## Online supporting references

- [1] Abbott, R. J. 2017 Plant speciation across environmental gradients and the occurrence and nature of hybrid zones. *J Syst Evol* **55**, 238-258. (DOI:10.1111/jse.12267).
- [2] Rieseberg, L. H., Church, S. A. & Morjan, C. L. 2004 Integration of populations and differentiation of species. *New Phytol* **161**, 59-69. (DOI:10.1046/j.1469-8137.2003.00933.x).
- [3] Wright, S. 1931 Evolution in Mendelian Populations. *Genetics* **16**, 97-159.
- [4] Bolger, A. M., Lohse, M. & Usadel, B. 2014 Trimmomatic: a flexible trimmer for Illumina sequence data. *Bioinformatics* **30**, 2114-2120. (DOI:10.1093/bioinformatics/btu170).
- [5] Tuskan, G. A. & Difazio, S. & Jansson, S. & Bohlmann, J. & Grigoriev, I. & Hellsten, U. & Putnam, N. & Ralph, S. & Rombauts, S. & Salamov, A., et al. 2006 The genome of black cottonwood, *Populus trichocarpa* (Torr. & Gray). *Science (New York, N.Y.)* **313**, 1596-1604. (DOI:10.1126/science.1128691).
- [6] Li, H. 2013 Aligning sequence reads, clone sequences and assembly contigs with BWA-MEM. In *arXiv:1303.3997v2* (q-bio.GN)
- [7] DePristo, M. A., Banks, E., Poplin, R., Garimella, K. V., Maguire, J. R., Hartl, C., Philippakis, A. A., del Angel, G., Rivas, M. A., Hanna, M., et al. 2011 A framework for variation discovery and genotyping using next-generation DNA sequencing data. *Nat Genet* **43**, 491. (DOI:10.1038/ng.806).
- [8] McKenna, A., Hanna, M., Banks, E., Sivachenko, A., Cibulskis, K., Kernytzky, A., Garimella, K., Altshuler, D., Gabriel, S., Daly, M., et al. 2010 The Genome Analysis Toolkit: a MapReduce framework for analyzing next-generation DNA sequencing data. *Genome Res* **20**, 1297-1303. (DOI:10.1101/gr.107524.110).
- [9] Liu, L., Yu, L. & Edwards, S. V. 2010 A maximum pseudo-likelihood approach for estimating species trees under the coalescent model. *BMC Evol Biol* **10**, 302. (DOI:10.1186/1471-2148-10-302).
- [10] Stamatakis, A. 2014 RAxML version 8: a tool for phylogenetic analysis and post-analysis of large phylogenies. *Bioinformatics* **30**, 1312-1313. (DOI:10.1093/bioinformatics/btu033).
- [11] Yang, Z. 1997 PAML: a program package for phylogenetic analysis by maximum likelihood. *Computer applications in the biosciences : CABIOS* **13**, 555-556.
- [12] Christe, C., Stolting, K. N., Paris, M., Frasmall yi, U. C., Bierne, N. & Lexer, C. 2017 Adaptive evolution and segregating load contribute to the genomic landscape of divergence in two tree species connected by episodic gene flow. *Mol Ecol* **26**, 59-76. (DOI:10.1111/mec.13765).
- [13] Wang, J., Street, N. R., Scofield, D. G. & Ingvarsson, P. K. 2016 Variation in linked selection and recombination drive genomic divergence during allopatric speciation of European and American aspens. *Mol Biol Evol* **33**, 1754-1767. (DOI:10.1093/molbev/msw051).
